# Supplementary material for: Evaluation of digital soil mapping approaches with large sets of environmental covariates
Source: Copernicus journal article supplement (doi:10.5194/soil-4-1-2018), 2018-01-10
Supplement: Supplementary file [file soil-4-1-2018-supplement.pdf]

Supplement of SOIL, 4, 1–22, 2018  
<https://doi.org/10.5194/soil-4-1-2018-supplement>  
© Author(s) 2018. This work is distributed under  
the Creative Commons Attribution 3.0 License.

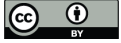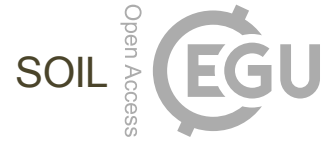

*Supplement of*

## **Evaluation of digital soil mapping approaches with large sets of environmental covariates**

**Madlene Nussbaum et al.**

*Correspondence to:* Madlene Nussbaum (madlene.nussbaum@env.ethz.ch)

The copyright of individual parts of the supplement might differ from the CC BY 3.0 License.

## Supplementary Material

### List of Figures

|    |                                                       |   |
|----|-------------------------------------------------------|---|
| S1 | Overview of sites topsoil clay – Berne . . . . .      | 2 |
| S2 | Overview of sites topsoil clay – Greifensee . . . . . | 2 |
| S3 | Overview of sites topsoil ECEC – ZH forest . . . . .  | 3 |

### List of Tables

|     |                                                                          |    |
|-----|--------------------------------------------------------------------------|----|
| S1  | Details on soil analysis and data harmonization . . . . .                | 4  |
| S2  | Details on geodata and covariates . . . . .                              | 5  |
| S3  | Descriptive statistics of soil properties – Berne . . . . .              | 6  |
| S4  | Descriptive statistics of soil properties – Berne (cont.) . . . . .      | 7  |
| S5  | Descriptive statistics of soil properties – Greifensee . . . . .         | 8  |
| S6  | Descriptive statistics of soil properties – Greifensee (cont.) . . . . . | 9  |
| S7  | Descriptive statistics of soil properties – ZH forest . . . . .          | 10 |
| S8  | Cross-validation statistics . . . . .                                    | 11 |
| S9  | Ratio of bias <sup>2</sup> to MSE . . . . .                              | 12 |
| S10 | Optimal model parameters – Berne . . . . .                               | 13 |
| S11 | Optimal model parameters – Greifensee, ZH forest . . . . .               | 14 |

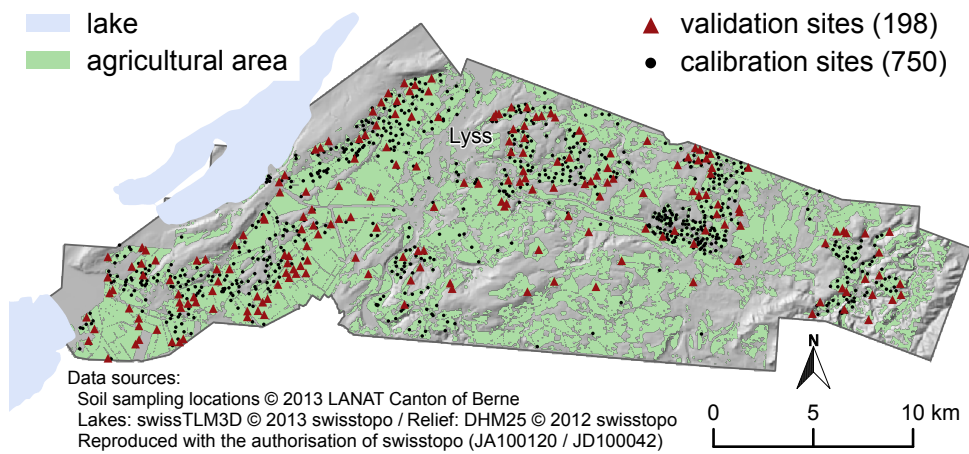

**Figure S1:** Location of sites in the Berne study region shown as an example for topsoil clay content (0–10 cm). Black dots are locations used for model calibration, locations with red triangles were used for model validation.

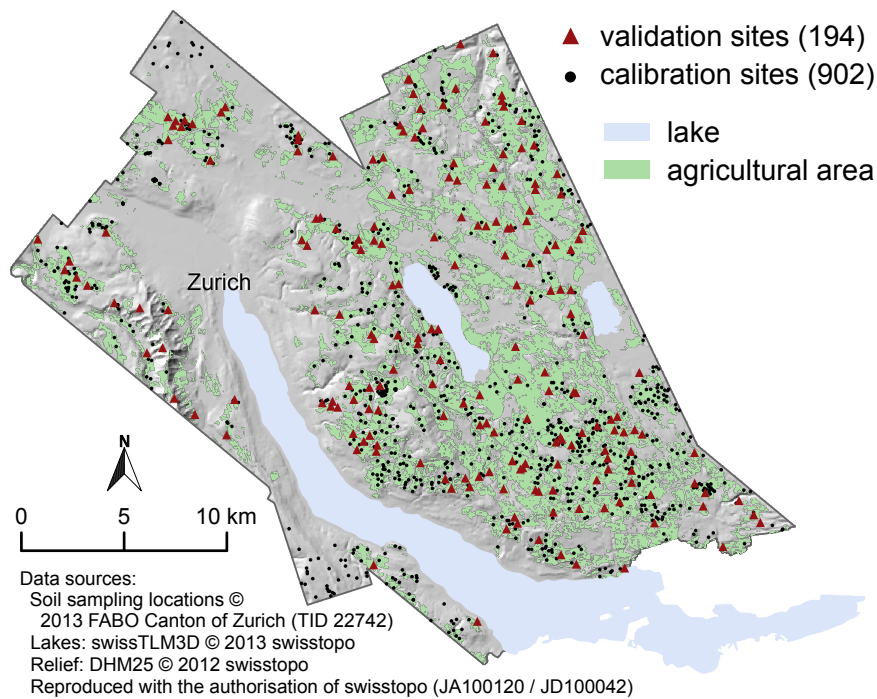

**Figure S2:** Location of sites in the Greifensee study region shown as an example for topsoil clay content (0–10 cm). Black dots are locations used for model calibration, locations with red triangles were used for model validation.

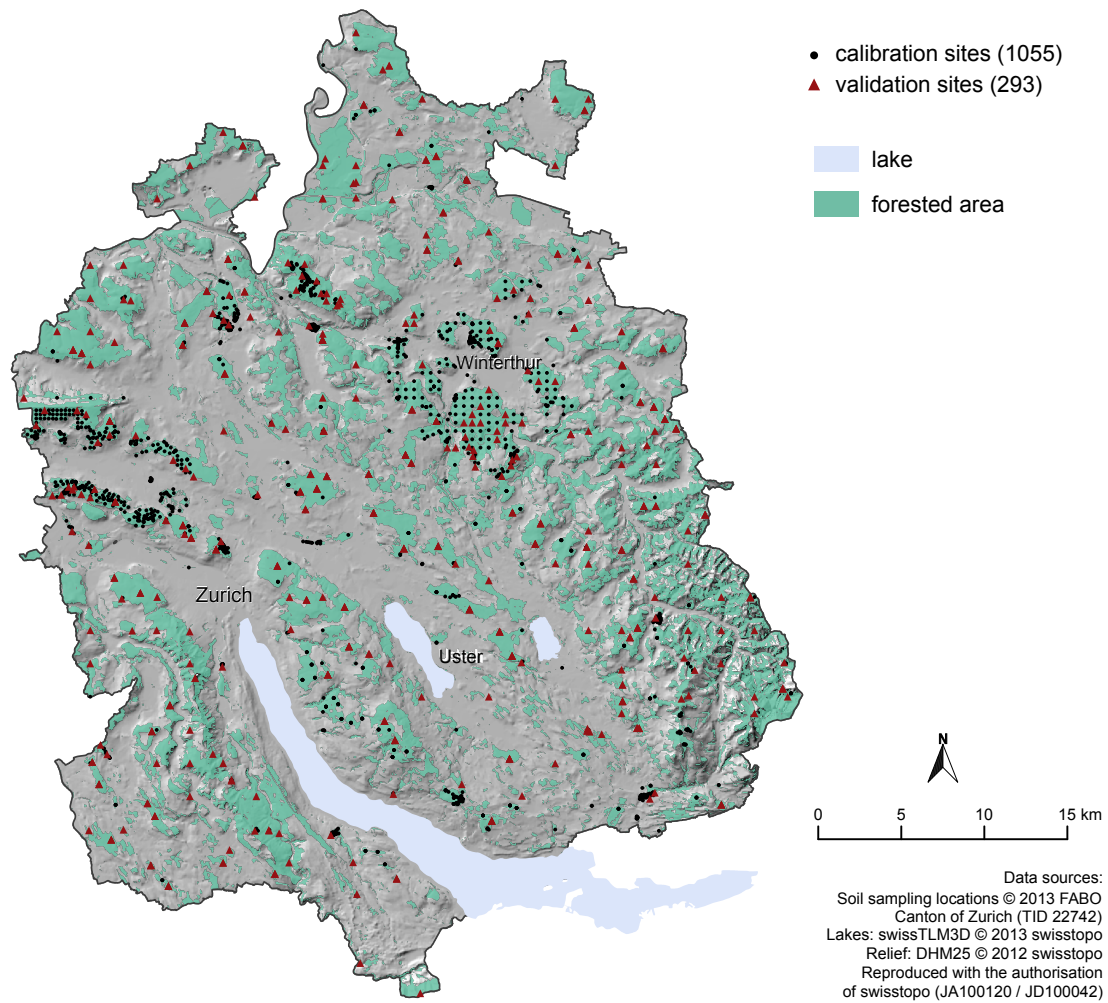

**Figure S3:** Location of sites in the ZH forest study region shown as an example for topsoil effective cation exchange capacity (ECEC, 0–20 cm). Black dots are locations used for model calibration, locations with red triangles were used for model validation.

**Table S1:** Details on soil analysis methods and remarks on soil data harmonization for modelled soil properties, more information can be found in Walthert et al. (2016, F: percentage of field estimates, PTF: percentage of observations calculated by pedotransfer functions [PTF], a: study region Be: Berne, Gr: Greifensee, Zf: ZH forest, SOM: soil organic matter, SD: soil depth, BD: bulk density of fine soil fraction  $\leq 2$  mm).

| property | r               | soil analysis method                                                                                                                                                                                                               | soil data harmonization                                                                                                                                                                                                                                                                                                                                                                                                                                                                                                                                                    | F [%]                          | PTF [%]         | unit                               |
|----------|-----------------|------------------------------------------------------------------------------------------------------------------------------------------------------------------------------------------------------------------------------------|----------------------------------------------------------------------------------------------------------------------------------------------------------------------------------------------------------------------------------------------------------------------------------------------------------------------------------------------------------------------------------------------------------------------------------------------------------------------------------------------------------------------------------------------------------------------------|--------------------------------|-----------------|------------------------------------|
| texture  | Be, Gr          | sedimentation (ELF, 1996; Ribí, 2014), field estimates (ordinal data, Brunner et al., 1997; Jägglí et al., 1998)                                                                                                                   | accordance of field estimates and pipette measurements: RMSE 7.1–9.8 % for clay and 8.2–13.2 % for silt depending on source/survey (Walthert et al., 2016)                                                                                                                                                                                                                                                                                                                                                                                                                 | Be: 78<br>Gr: 48               |                 | wt.%                               |
| gravel   | Be, Gr          | volumetric content of coarse fragments > 2 mm estimated in the field (ordinal data, Brunner et al., 1997; Jägglí et al., 1998)                                                                                                     |                                                                                                                                                                                                                                                                                                                                                                                                                                                                                                                                                                            | Be: 100<br>Gr: 100             |                 | vol.%                              |
| pH       | Be, Gr, Zf      | potentiometric measurements in H <sub>2</sub> O or CaCl <sub>2</sub> , partly field-moist samples (Zf), field estimates (ordinal data by pH indicator solution, ELF, 1996; Jägglí et al., 1998; Ribí, 2008; Walthert et al., 2004) | robust linear regression to transfer H <sub>2</sub> O measurements to CaCl <sub>2</sub> , calibrated on 227 samples (60 sites): $pH_{CaCl_2} = 1.00 * pH_{H_2O} - 0.46$ , RMSE 0.195, $SS_{mse}$ 0.945 computed on 55 samples (12 sites) not used for model calibration. Accordance of field estimates and $pH_{CaCl_2}$ : RMSE 0.521, $SS_{mse}$ 0.726.                                                                                                                                                                                                                   | Be: 72<br>Zf: 30 (field-moist) | Be: 9<br>Gr: 10 | –                                  |
| SOM      | Be, Gr          | oxidation with K <sub>2</sub> Cr <sub>2</sub> O <sub>7</sub> / H <sub>2</sub> SO <sub>4</sub> (ELF, 1996), field estimates (ordinal data, Brunner et al., 1997; Jägglí et al., 1998)                                               | accordance of field estimates with measurements: RMSE 6.822 %, $SS_{mse}$ 0.745 for Be, RMSE 3.51 %, $SS_{mse}$ 0.786 for Gr.                                                                                                                                                                                                                                                                                                                                                                                                                                              | Be: 77<br>Gr: 33               |                 | wt.%                               |
| ECEC     | Zf              | 1 M ammonium chloride extraction (FAC, 1989; Walthert et al., 2004, 2013), 0.5 M ammonium acetate and 0.02 EDTA extraction at pH 4.65 (Lakanen and Erviö, 1971; ELF, 1996)                                                         | robust linear regression to estimate ECEC from Ca, Mg, K and Al measured by ammonium acetate/EDTA extraction with 604 samples (198 sites), $SS_{mse}$ 0.939, RMSE 2.650 log mmol <sub>e</sub> , computed on 142 samples (49 sites) not used for calibration (Nussbaum and Papritz, 2015).                                                                                                                                                                                                                                                                                  |                                | Zf: 9           | mmol <sub>e</sub> kg <sup>-1</sup> |
| SD       | Be, Gr          | Plant exploitable (effective) soil depth (SD) estimated in field (ordinal data, Jägglí et al., 1998)                                                                                                                               | SD derived from horizon thickness $d_i$ , presence of water-logging horizon qualifiers ( $g_i = 0.33$ , $gg_i = 0.33$ , $r_i = 0.33$ , $r_i = 0.1$ ) and C horizon (parent material, $w_i = 0$ ) by $SD = \sum_{i=1}^n d_i (1 - s_i) w_i$ where $w_i = 1$ in case of absence of mentioned qualifiers and $s_i$ volumetric gravel content [%] of horizon $i$ .                                                                                                                                                                                                              | Gr: 100                        | Be: 100         | cm                                 |
| BD       | Zf <sup>1</sup> | bulk density of fine soil fraction (diameter $\leq 2$ mm) sampled by volumetric cores (Brunner et al., 1997; Walthert et al., 2004)                                                                                                | robust linear regression with samples from Be, Gr and Swiss forests (Nussbaum et al., 2016) with SOM, soil depth and land use as covariates, calibrated on 757 samples (245 sites) with RMSE 0.253 Mg m <sup>-3</sup> , $SS_{mse}$ 0.508 computed on 279 samples (81 sites) not used for calibration. Where SOM was missing PTF with sampling depth and land use only, calibrated on 1040 samples (308 sites) with RMSE 0.333 Mg m <sup>-3</sup> , $SS_{mse}$ 0.147 computed on same 279 samples (latter PTF used only to transfer samples to comparable depth intervals). |                                | Zf: 98          | Mg m <sup>-3</sup>                 |

<sup>1</sup> BD was used in Be, Gr and Zf to convert data related to soil horizons to fixed-depth intervals (see Sect. 2.2).

**Table S2:** Details on geodata sets and derived covariates ( $r$ : pixel size for raster datasets or scale for vector datasets,  $a$ : limited to study region Be: Berne, Gr: Greifensee or Zf: ZH forest,  $n$ : number of covariates per dataset).

| geodata set                                         | $r$       | $a$   | $n$ | description and details on covariate derivations                                                                                                                                                                                                                                                                                                                                                                                                                                                                                                                                                                                                                                                                                                                                                                                                                                                                                                                                               |
|-----------------------------------------------------|-----------|-------|-----|------------------------------------------------------------------------------------------------------------------------------------------------------------------------------------------------------------------------------------------------------------------------------------------------------------------------------------------------------------------------------------------------------------------------------------------------------------------------------------------------------------------------------------------------------------------------------------------------------------------------------------------------------------------------------------------------------------------------------------------------------------------------------------------------------------------------------------------------------------------------------------------------------------------------------------------------------------------------------------------------|
| <b>Soil</b>                                         |           |       |     | adapted 30 physiographic units of soil overview map (Nussbaum et al., 2014), evidence on drained wetlands from historic maps, presence of drainage networks on agricultural land, evidence on anthropogenic interventions in soil (e.g. soil ameliorations), potential for agricultural production for different crops.                                                                                                                                                                                                                                                                                                                                                                                                                                                                                                                                                                                                                                                                        |
| Soil overview map (FSO, 2000a)                      | 1:200 000 |       | 8   |                                                                                                                                                                                                                                                                                                                                                                                                                                                                                                                                                                                                                                                                                                                                                                                                                                                                                                                                                                                                |
| Wetlands Wild maps (ALN, 2002)                      | 1:50 000  | Gr    | 1   |                                                                                                                                                                                                                                                                                                                                                                                                                                                                                                                                                                                                                                                                                                                                                                                                                                                                                                                                                                                                |
| Wetlands Siegfried maps (Wüst-Galley et al., 2015)  | 1:25 000  | Gr    | 1   |                                                                                                                                                                                                                                                                                                                                                                                                                                                                                                                                                                                                                                                                                                                                                                                                                                                                                                                                                                                                |
| Agricultural suitability (LANAT, 2015)              | 1:25 000  | Be    | 1   |                                                                                                                                                                                                                                                                                                                                                                                                                                                                                                                                                                                                                                                                                                                                                                                                                                                                                                                                                                                                |
| Anthropogenic soil interventions (AWEL, 2012)       | 1:5 000   | Gr    | 1   |                                                                                                                                                                                                                                                                                                                                                                                                                                                                                                                                                                                                                                                                                                                                                                                                                                                                                                                                                                                                |
| Drainage networks (ALN, 2014b)                      | 1:5 000   | Gr    | 2   |                                                                                                                                                                                                                                                                                                                                                                                                                                                                                                                                                                                                                                                                                                                                                                                                                                                                                                                                                                                                |
| <b>Parent material</b>                              |           |       |     | geological/geotechnical map units (partly aggregated a priori), sheets of geological map (Swisstopo, 2016) coarsely harmonized through legend matching and aggregation, $CaCO_3$ index based on geotechnical map (BAFU and GRID-Europe, 2010), closest distance between soil sampling point and geological line or polygon object on Zurich geological map (ALN, 2014a), drumlins, moraines of different glacial stages), approximate ice level during last glaciation, presence of aquifer, aquifer covered by impermeable layer, areas suitable for gravel exploitation.                                                                                                                                                                                                                                                                                                                                                                                                                     |
| Geological overview map (Swisstopo, 2005)           | 1:500 000 | Be    | 4   |                                                                                                                                                                                                                                                                                                                                                                                                                                                                                                                                                                                                                                                                                                                                                                                                                                                                                                                                                                                                |
| Map of last glacial maximum (Swisstopo, 2009)       | 1:500 000 |       | 1   |                                                                                                                                                                                                                                                                                                                                                                                                                                                                                                                                                                                                                                                                                                                                                                                                                                                                                                                                                                                                |
| Geotechnical map (BFS, 2001)                        | 1:200 000 |       | 2   |                                                                                                                                                                                                                                                                                                                                                                                                                                                                                                                                                                                                                                                                                                                                                                                                                                                                                                                                                                                                |
| Geological map (ALN, 2014a)                         | 1:50 000  |       | 7   |                                                                                                                                                                                                                                                                                                                                                                                                                                                                                                                                                                                                                                                                                                                                                                                                                                                                                                                                                                                                |
| Geological maps (Swisstopo, 2016)                   | 1:25 000  | Be    | 1   |                                                                                                                                                                                                                                                                                                                                                                                                                                                                                                                                                                                                                                                                                                                                                                                                                                                                                                                                                                                                |
| Groundwater map (AWEL, 2014; AWA, 2014b)            | 1:25 000  | Gr    | 2   |                                                                                                                                                                                                                                                                                                                                                                                                                                                                                                                                                                                                                                                                                                                                                                                                                                                                                                                                                                                                |
| Hydrogeological infiltration zones (AWA, 2014a)     | 1:25 000  | Be    | 2   |                                                                                                                                                                                                                                                                                                                                                                                                                                                                                                                                                                                                                                                                                                                                                                                                                                                                                                                                                                                                |
| Mineral raw materials (AGR, 2015)                   | 1:25 000  | Be    | 1   |                                                                                                                                                                                                                                                                                                                                                                                                                                                                                                                                                                                                                                                                                                                                                                                                                                                                                                                                                                                                |
| <b>Climate</b>                                      |           |       |     | mean annual/monthly temperature and precipitation, cloud cover, sunshine duration, radiation, degree days, continentality index (Gams, 1935), temperature variation, ratio of actual to potential evapotranspiration and site water balance (Grier and Running, 1977; Gurtz et al., 1999), $NH_3$ concentration in air, $NO_2$ immissions of years 2000, 2005, 2010.                                                                                                                                                                                                                                                                                                                                                                                                                                                                                                                                                                                                                           |
| MeteoSwiss 1961–1990 (Zimmermann and Kienast, 1999) | 25/100 m  |       | 33  |                                                                                                                                                                                                                                                                                                                                                                                                                                                                                                                                                                                                                                                                                                                                                                                                                                                                                                                                                                                                |
| MeteoTest 1975–2010 (Remund et al., 2011)           | 250 m     |       | 38  |                                                                                                                                                                                                                                                                                                                                                                                                                                                                                                                                                                                                                                                                                                                                                                                                                                                                                                                                                                                                |
| Air pollutants (BAFU, 2011)                         | 500 m     | Zf    | 2   |                                                                                                                                                                                                                                                                                                                                                                                                                                                                                                                                                                                                                                                                                                                                                                                                                                                                                                                                                                                                |
| $NO_2$ immissions (AWEL, 2015)                      | 100 m     | Gr    | 3   |                                                                                                                                                                                                                                                                                                                                                                                                                                                                                                                                                                                                                                                                                                                                                                                                                                                                                                                                                                                                |
| <b>Vegetation</b>                                   |           |       |     | vegetation map units (aggregated a priori with ecograms), maximal potential to grow deciduous trees (vegetation map), percentage of coniferous trees derived from spectral imagery (FSO, 2000b) and species composition data of National Forest Inventory (Brassel and Lischke, 2001, NFI), canopy height (difference of digital terrain to surface model), spectral reflectance in green, red, near infrared, band ratios, normalized difference vegetation index (NDVI, Krieger et al., 1969) of SPOT5 and DMC, bands of Landsat7, 180 hyperspectral bands in solar reflected wavelength from 470 to 2420 nm of two fully processed and mosaicked (Jehle et al., 2010; Hueni et al., 2013) flight lines sampled by the APEX imaging spectrometer (flight campaigns 09/2013, 04/2014, spectral resolution of 0.6–11 nm, Schaepman et al., 2015), with indicator covariate to account for different sampling dates (at overlap only mosaic from 04/2014 with larger contiguous area was used). |
| Landsat7 scene (USGS EROS, 2013)                    | 30 m      |       | 9   |                                                                                                                                                                                                                                                                                                                                                                                                                                                                                                                                                                                                                                                                                                                                                                                                                                                                                                                                                                                                |
| DMC mosaic (DMC, 2015)                              | 22 m      |       | 4   |                                                                                                                                                                                                                                                                                                                                                                                                                                                                                                                                                                                                                                                                                                                                                                                                                                                                                                                                                                                                |
| SPOT5 mosaic (Mathys and Kellenberger, 2009)        | 10 m      | Zf    | 12  |                                                                                                                                                                                                                                                                                                                                                                                                                                                                                                                                                                                                                                                                                                                                                                                                                                                                                                                                                                                                |
| APEX images (Schaepman et al., 2015)                | 2 m       | Gr:Be | 180 |                                                                                                                                                                                                                                                                                                                                                                                                                                                                                                                                                                                                                                                                                                                                                                                                                                                                                                                                                                                                |
| Share of coniferous trees (FSO, 2000b)              | 25 m      | Zf    | 1   |                                                                                                                                                                                                                                                                                                                                                                                                                                                                                                                                                                                                                                                                                                                                                                                                                                                                                                                                                                                                |
| Vegetation map (Schmider et al., 1993)              | 1:5 000   | Zf    | 2   |                                                                                                                                                                                                                                                                                                                                                                                                                                                                                                                                                                                                                                                                                                                                                                                                                                                                                                                                                                                                |
| Species composition (Brassel and Lischke, 2001)     | 25 m      | Zf    | 1   |                                                                                                                                                                                                                                                                                                                                                                                                                                                                                                                                                                                                                                                                                                                                                                                                                                                                                                                                                                                                |
| Digital surface model (Swisstopo, 2011)             | 2 m       | Zf    | 1   |                                                                                                                                                                                                                                                                                                                                                                                                                                                                                                                                                                                                                                                                                                                                                                                                                                                                                                                                                                                                |
| <b>Topography</b>                                   |           |       |     | elevation, slope angle, northing and easting aspects, planar, profile and combined curvatures (all with smoothed versions and standard deviations in circular neighbourhoods of different radii), topographic position indices (Zimmermann, 2000; Jenness, 2006), terrain ruggedness indices (Riley et al., 1999), roughness (Evans et al., 2014), dissection (Evans, 1972), surface to area ratio (Berry, 2002), multi-resolution valley bottom flatness (Gallant and Dowling, 2003), multi-resolution ridge top flatness (Gallant et al., 2013), positive and negative openness (Yokoyama et al., 2002), convergence indices (Kiss, 2004), LS factor (Van Remortel et al., 2004), vector ruggedness measure (Hobson, 1972), surface convexity (Iwahashi and Pike, 2007), flow accumulation area, flow length, topographic wetness indices by single and multi-flow algorithms (Tarboton, 1997) and vertical/horizontal distance to existing water bodies (BAFU, 2009, scale 1:25 000).       |
| Digital elevation model (Swisstopo, 2011)           | 25 m      |       | 62  |                                                                                                                                                                                                                                                                                                                                                                                                                                                                                                                                                                                                                                                                                                                                                                                                                                                                                                                                                                                                |
| Digital terrain model (Swisstopo, 2013)             | 2 m       |       | 134 |                                                                                                                                                                                                                                                                                                                                                                                                                                                                                                                                                                                                                                                                                                                                                                                                                                                                                                                                                                                                |

**Table S3:** Descriptive statistics of soil properties for **Berne** study regions by soil depth [cm] (N: number of samples, Ns: number of sampling sites, set: calibration dataset (c), independent validation dataset (v), Min: observed minimum, Max: observed maximum,  $\mu$ : mean,  $\sigma$ : standard deviation, SOM: soil organic matter, SD: effective soil depth, units see Table S1).

| response | depth  | set | N   | Ns  | Min    | Max     | Median | $\mu$  | $\sigma$ |
|----------|--------|-----|-----|-----|--------|---------|--------|--------|----------|
| clay     | 0-10   | c   | 750 | 750 | 0.000  | 65.690  | 15.000 | 17.396 | 7.316    |
|          |        | v   | 198 | 198 | 2.000  | 53.930  | 15.000 | 17.670 | 7.650    |
|          | 10-30  | c   | 771 | 771 | 0.000  | 76.200  | 15.000 | 17.919 | 8.383    |
|          |        | v   | 198 | 198 | 2.200  | 53.930  | 15.750 | 18.501 | 8.397    |
|          | 30-50  | c   | 733 | 733 | 0.000  | 76.200  | 16.180 | 18.433 | 9.145    |
|          |        | v   | 198 | 198 | 0.000  | 67.000  | 16.000 | 18.794 | 9.516    |
|          | 50-100 | c   | 741 | 741 | 0.000  | 76.200  | 16.000 | 17.832 | 9.864    |
|          |        | v   | 198 | 198 | 0.000  | 48.550  | 16.000 | 17.281 | 9.016    |
| silt     | 0-10   | c   | 753 | 753 | 2.000  | 75.000  | 25.000 | 27.581 | 10.531   |
|          |        | v   | 198 | 198 | 5.000  | 75.000  | 25.000 | 28.953 | 12.991   |
|          | 10-30  | c   | 776 | 776 | 1.800  | 75.000  | 25.000 | 28.505 | 11.541   |
|          |        | v   | 198 | 198 | 4.400  | 75.000  | 25.000 | 29.828 | 12.583   |
|          | 30-50  | c   | 736 | 736 | 2.000  | 75.000  | 26.000 | 29.807 | 12.618   |
|          |        | v   | 198 | 198 | 4.400  | 75.000  | 25.000 | 31.441 | 15.413   |
|          | 50-100 | c   | 743 | 743 | 2.000  | 75.000  | 27.143 | 31.004 | 15.261   |
|          |        | v   | 198 | 198 | 4.400  | 75.000  | 25.000 | 31.334 | 16.320   |
| gravel   | 0-10   | c   | 836 | 836 | 0.000  | 25.000  | 2.000  | 2.711  | 3.178    |
|          |        | v   | 198 | 198 | 0.000  | 15.000  | 2.000  | 2.556  | 2.773    |
|          | 10-30  | c   | 836 | 836 | 0.000  | 24.000  | 2.000  | 2.960  | 3.607    |
|          |        | v   | 198 | 198 | 0.000  | 29.000  | 2.000  | 2.907  | 3.676    |
|          | 30-50  | c   | 834 | 834 | 0.000  | 40.000  | 2.000  | 3.764  | 5.359    |
|          |        | v   | 198 | 198 | 0.000  | 50.000  | 2.000  | 3.705  | 5.455    |
|          | 50-100 | c   | 827 | 827 | 0.000  | 45.500  | 1.600  | 4.838  | 7.448    |
|          |        | v   | 198 | 198 | 0.000  | 51.000  | 2.100  | 4.779  | 6.660    |
| SOM      | 0-10   | c   | 788 | 788 | 0.300  | 61.900  | 4.000  | 8.470  | 10.251   |
|          |        | v   | 198 | 198 | 0.900  | 57.400  | 4.000  | 7.191  | 7.507    |
|          | 10-30  | c   | 787 | 787 | 0.490  | 65.400  | 2.900  | 8.630  | 12.785   |
|          |        | v   | 198 | 198 | 0.875  | 46.500  | 3.000  | 6.018  | 7.356    |
|          | 30-50  | c   | 702 | 702 | 0.000  | 81.100  | 1.000  | 10.532 | 18.674   |
|          |        | v   | 198 | 198 | 0.000  | 50.000  | 1.000  | 4.266  | 8.242    |
|          | 50-100 | c   | 480 | 480 | 0.000  | 85.000  | 1.000  | 15.711 | 25.414   |
|          |        | v   | 197 | 197 | 0.000  | 72.220  | 0.800  | 5.720  | 12.807   |
| pH       | 0-10   | c   | 728 | 661 | 4.500  | 8.500   | 6.300  | 6.375  | 0.761    |
|          |        | v   | 211 | 198 | 4.600  | 8.600   | 6.400  | 6.410  | 0.842    |
|          | 10-30  | c   | 723 | 657 | 4.400  | 8.500   | 6.304  | 6.371  | 0.755    |
|          |        | v   | 211 | 198 | 4.301  | 8.671   | 6.390  | 6.404  | 0.848    |
|          | 30-50  | c   | 713 | 647 | 4.300  | 8.700   | 6.400  | 6.414  | 0.803    |
|          |        | v   | 211 | 198 | 4.300  | 9.000   | 6.504  | 6.482  | 0.931    |
|          | 50-100 | c   | 716 | 650 | 3.676  | 9.100   | 6.500  | 6.472  | 0.875    |
|          |        | v   | 211 | 198 | 4.300  | 9.000   | 6.731  | 6.609  | 1.016    |
| SD       | -      | c   | 838 | 838 | 12.750 | 224.000 | 70.000 | 72.946 | 31.454   |
|          |        | v   | 198 | 198 | 8.000  | 170.100 | 71.536 | 76.115 | 33.084   |

**Table S4:** Descriptive statistics of soil properties for **Berne** study region by soil depth [cm], continued (CV: coefficient of variation  $\sigma/\mu$ ,  $CV_r$ : robust coefficient of variation [ratio of inter quantile range to median], Skew: coefficient of skewness,  $\alpha$ : effective range of experimental sample variogram [km], SSVR: spatially structured variance ratio  $1 - \text{nugget}/\text{sill}_{\text{tot}}$  [Vaysse and Lagacherie, 2015], Tr: transformation of response, sqrt: transformed by square root, ln: transformed by natural logarithm, SOM: soil organic matter, SD: effective soil depth available to plants, units see Table S1).

| response | depth  | set | CV    | $CV_r$ | Skew   | $\alpha$ | SSVR  | Tr   |
|----------|--------|-----|-------|--------|--------|----------|-------|------|
| clay     | 0-10   | c   | 0.421 | 0.600  | 1.723  | 16.000   | 0.720 |      |
|          |        | v   | 0.433 | 0.667  | 1.449  |          |       |      |
|          | 10-30  | c   | 0.468 | 0.600  | 2.219  | 8.100    | 0.708 |      |
|          |        | v   | 0.454 | 0.603  | 1.474  |          |       |      |
|          | 30-50  | c   | 0.496 | 0.575  | 1.715  | 5.700    | 0.644 |      |
|          |        | v   | 0.506 | 0.691  | 1.356  |          |       |      |
|          | 50-100 | c   | 0.553 | 0.725  | 1.290  | 3.700    | 0.575 |      |
|          |        | v   | 0.522 | 0.666  | 0.668  |          |       |      |
| silt     | 0-10   | c   | 0.382 | 0.354  | 1.857  | 1.800    | 1.000 |      |
|          |        | v   | 0.449 | 0.200  | 2.157  |          |       |      |
|          | 10-30  | c   | 0.405 | 0.454  | 1.635  | 2.300    | 0.973 |      |
|          |        | v   | 0.422 | 0.349  | 1.727  |          |       |      |
|          | 30-50  | c   | 0.423 | 0.433  | 1.231  | 4.200    | 0.812 |      |
|          |        | v   | 0.490 | 0.445  | 1.240  |          |       |      |
|          | 50-100 | c   | 0.492 | 0.568  | 0.893  | 3.700    | 0.786 |      |
|          |        | v   | 0.521 | 0.699  | 1.068  |          |       |      |
| gravel   | 0-10   | c   | 1.172 | 1.000  | 2.545  | 8.900    | 0.613 | sqrt |
|          |        | v   | 1.085 | 1.500  | 2.205  |          |       |      |
|          | 10-30  | c   | 1.219 | 1.625  | 2.377  | 8.900    | 0.436 | sqrt |
|          |        | v   | 1.265 | 1.694  | 3.212  |          |       |      |
|          | 30-50  | c   | 1.424 | 2.500  | 2.543  | 4.700    | 0.529 | sqrt |
|          |        | v   | 1.472 | 2.500  | 4.286  |          |       |      |
|          | 50-100 | c   | 1.540 | 4.375  | 2.421  | 2.400    | 0.910 | sqrt |
|          |        | v   | 1.394 | 3.298  | 2.771  |          |       |      |
| SOM      | 0-10   | c   | 1.210 | 0.750  | 2.233  | 4.100    | 0.888 | ln   |
|          |        | v   | 1.044 | 0.956  | 2.914  |          |       |      |
|          | 10-30  | c   | 1.481 | 1.138  | 2.225  | 3.800    | 0.918 | ln   |
|          |        | v   | 1.222 | 1.137  | 2.533  |          |       |      |
|          | 30-50  | c   | 1.773 | 6.244  | 1.894  | 2.600    | 0.974 | ln   |
|          |        | v   | 1.932 | 2.250  | 3.215  |          |       |      |
|          | 50-100 | c   | 1.618 | 23.420 | 1.375  | 2.200    | 1.000 | ln   |
|          |        | v   | 2.239 | 2.344  | 3.006  |          |       |      |
| pH       | 0-10   | c   | 0.119 | 0.190  | 0.082  | 2.900    | 0.640 |      |
|          |        | v   | 0.131 | 0.203  | 0.081  |          |       |      |
|          | 10-30  | c   | 0.119 | 0.186  | 0.047  | 6.200    | 0.592 |      |
|          |        | v   | 0.132 | 0.216  | 0.053  |          |       |      |
|          | 30-50  | c   | 0.125 | 0.188  | -0.065 | 4.500    | 0.634 |      |
|          |        | v   | 0.144 | 0.230  | -0.029 |          |       |      |
|          | 50-100 | c   | 0.135 | 0.185  | -0.253 | 4.500    | 0.671 |      |
|          |        | v   | 0.154 | 0.229  | -0.225 |          |       |      |
| SD       | -      | c   | 0.431 | 0.703  | 0.464  | -        | -     |      |
|          |        | v   | 0.435 | 0.663  | 0.488  |          |       |      |



**Table S5:** Descriptive statistics of soil properties for **Greifensee** study region by soil depth [cm] (N: number of samples, Ns: number of sampling sites, set: calibration dataset (c), independent validation dataset (v), Min: observed minimum, Max: observed maximum,  $\mu$ : mean,  $\sigma$ : standard deviation, SOM: soil organic matter, SD: effective soil depth, units see Table S1).

| response | depth  | set | N    | Ns   | Min    | Max     | Median | $\mu$  | $\sigma$ |
|----------|--------|-----|------|------|--------|---------|--------|--------|----------|
| clay     | 0-10   | c   | 913  | 902  | 8.000  | 59.520  | 25.000 | 26.412 | 7.402    |
|          |        | v   | 194  | 194  | 12.000 | 48.700  | 25.000 | 25.242 | 7.023    |
|          | 10-30  | c   | 913  | 902  | 8.000  | 58.750  | 25.150 | 26.434 | 7.386    |
|          |        | v   | 194  | 194  | 12.000 | 59.400  | 25.000 | 25.505 | 7.626    |
|          | 30-50  | c   | 864  | 853  | 6.400  | 64.200  | 25.420 | 26.637 | 8.174    |
|          |        | v   | 183  | 183  | 9.150  | 46.259  | 25.000 | 25.506 | 8.021    |
|          | 50-100 | c   | 852  | 841  | 2.400  | 60.400  | 25.585 | 25.912 | 8.970    |
|          |        | v   | 183  | 183  | 2.884  | 47.620  | 25.160 | 24.988 | 9.168    |
| silt     | 0-10   | c   | 913  | 902  | 12.300 | 60.000  | 31.990 | 32.383 | 6.189    |
|          |        | v   | 198  | 198  | 12.250 | 55.000  | 32.000 | 32.664 | 6.855    |
|          | 10-30  | c   | 913  | 902  | 17.000 | 60.000  | 32.000 | 32.524 | 6.273    |
|          |        | v   | 198  | 198  | 12.250 | 55.000  | 32.002 | 32.728 | 6.854    |
|          | 30-50  | c   | 866  | 855  | 15.000 | 65.900  | 32.250 | 33.312 | 7.365    |
|          |        | v   | 198  | 198  | 1.500  | 61.400  | 32.000 | 32.856 | 8.062    |
|          | 50-100 | c   | 852  | 841  | 4.600  | 71.000  | 33.000 | 34.239 | 9.062    |
|          |        | v   | 198  | 198  | 7.700  | 69.000  | 32.025 | 32.867 | 9.093    |
| gravel   | 0-10   | c   | 743  | 743  | 0.000  | 35.000  | 6.000  | 7.534  | 6.365    |
|          |        | v   | 193  | 193  | 0.000  | 25.000  | 8.000  | 8.580  | 6.095    |
|          | 10-30  | c   | 744  | 744  | 0.000  | 35.000  | 7.500  | 8.120  | 6.691    |
|          |        | v   | 193  | 193  | 0.000  | 25.000  | 9.000  | 9.333  | 6.489    |
|          | 30-50  | c   | 739  | 739  | 0.000  | 56.250  | 8.400  | 9.967  | 8.795    |
|          |        | v   | 195  | 195  | 0.000  | 41.000  | 11.000 | 11.619 | 8.920    |
|          | 50-100 | c   | 719  | 719  | 0.000  | 65.000  | 11.240 | 12.707 | 10.901   |
|          |        | v   | 195  | 195  | 0.000  | 60.000  | 14.200 | 14.952 | 11.909   |
| SOM      | 0-10   | c   | 1255 | 1141 | 0.900  | 32.000  | 4.400  | 5.285  | 3.264    |
|          |        | v   | 453  | 277  | 1.000  | 44.700  | 4.820  | 5.554  | 3.653    |
|          | 10-30  | c   | 1165 | 1051 | 0.500  | 49.000  | 4.000  | 4.803  | 3.673    |
|          |        | v   | 453  | 277  | 1.000  | 44.700  | 4.600  | 5.315  | 3.731    |
|          | 30-50  | c   | 723  | 689  | 0.000  | 65.000  | 1.000  | 2.278  | 4.957    |
|          |        | v   | 134  | 119  | 0.000  | 38.600  | 1.480  | 2.806  | 5.659    |
|          | 50-100 | c   | 443  | 409  | 0.000  | 68.188  | 1.000  | 2.198  | 5.935    |
|          |        | v   | 134  | 119  | 0.000  | 51.700  | 1.400  | 2.867  | 6.841    |
| pH       | 0-10   | c   | 1210 | 1078 | 3.286  | 8.082   | 6.718  | 6.535  | 0.616    |
|          |        | v   | 452  | 277  | 4.220  | 7.800   | 6.200  | 6.209  | 0.730    |
|          | 10-30  | c   | 1121 | 989  | 3.286  | 7.805   | 6.686  | 6.521  | 0.621    |
|          |        | v   | 452  | 277  | 4.220  | 7.642   | 6.199  | 6.224  | 0.730    |
|          | 30-50  | c   | 412  | 379  | 4.431  | 8.137   | 6.794  | 6.671  | 0.720    |
|          |        | v   | 135  | 119  | 3.886  | 8.286   | 6.531  | 6.433  | 0.722    |
|          | 50-100 | c   | 371  | 338  | 4.164  | 8.383   | 6.775  | 6.708  | 0.713    |
|          |        | v   | 135  | 119  | 3.886  | 8.286   | 6.597  | 6.494  | 0.723    |
| SD       | -      | c   | 745  | 745  | 19.000 | 204.000 | 65.000 | 67.032 | 23.270   |
|          |        | v   | 198  | 198  | 12.000 | 184.000 | 66.000 | 70.394 | 22.820   |

**Table S6:** Descriptive statistics of soil properties for **Greifensee** by soil depth [cm], continued (CV: coefficient of variation  $\sigma/\mu$ ,  $CV_r$ : robust coefficient of variation [ratio of inter quantile range to median], Skew: coefficient of skewness,  $\alpha$ : effective range of experimental sample variogram [km], SSVR: spatially structured variance ratio  $1 - nugget/sill_{tot}$  [Vaysse and Lagacherie, 2015], Tr: transformation of response, sqrt: transformed by square root, ln: transformed by natural logarithm, SOM: soil organic matter, SD: effective soil depth available to plants, units see Table S1).

| response | depth  | set | CV    | $CV_r$ | Skew   | $\alpha$ | SSVR  | Tr   |
|----------|--------|-----|-------|--------|--------|----------|-------|------|
| clay     | 0-10   | c   | 0.280 | 0.315  | 1.007  | 4.800    | 0.465 |      |
|          |        | v   | 0.278 | 0.349  | 0.703  |          |       |      |
|          | 10-30  | c   | 0.279 | 0.330  | 0.932  | 5.400    | 0.475 |      |
|          |        | v   | 0.299 | 0.450  | 0.894  |          |       |      |
|          | 30-50  | c   | 0.307 | 0.401  | 0.519  | 1.500    | 0.485 |      |
|          |        | v   | 0.314 | 0.465  | 0.278  |          |       |      |
|          | 50-100 | c   | 0.346 | 0.462  | 0.166  | 3.200    | 0.381 |      |
|          |        | v   | 0.367 | 0.517  | 0.022  |          |       |      |
| silt     | 0-10   | c   | 0.191 | 0.217  | 0.883  | 3.300    | 0.425 |      |
|          |        | v   | 0.210 | 0.248  | 0.452  |          |       |      |
|          | 10-30  | c   | 0.193 | 0.236  | 0.842  | 2.600    | 0.498 |      |
|          |        | v   | 0.209 | 0.266  | 0.439  |          |       |      |
|          | 30-50  | c   | 0.221 | 0.272  | 0.808  | 3.100    | 0.357 |      |
|          |        | v   | 0.245 | 0.290  | 0.392  |          |       |      |
|          | 50-100 | c   | 0.265 | 0.328  | 0.774  | 2.300    | 0.515 |      |
|          |        | v   | 0.277 | 0.318  | 0.566  |          |       |      |
| gravel   | 0-10   | c   | 0.845 | 1.667  | 0.939  | 1.400    | 0.525 | sqrt |
|          |        | v   | 0.710 | 1.125  | 0.474  |          |       |      |
|          | 10-30  | c   | 0.824 | 1.333  | 0.799  | 1.600    | 0.426 | sqrt |
|          |        | v   | 0.695 | 1.056  | 0.436  |          |       |      |
|          | 30-50  | c   | 0.883 | 1.536  | 1.115  | 1.400    | 0.519 | sqrt |
|          |        | v   | 0.768 | 1.000  | 0.767  |          |       |      |
|          | 50-100 | c   | 0.858 | 1.406  | 0.927  | 1.900    | 0.530 | sqrt |
|          |        | v   | 0.796 | 1.206  | 0.879  |          |       |      |
| SOM      | 0-10   | c   | 0.618 | 0.550  | 3.395  | 2.500    | 0.611 | ln   |
|          |        | v   | 0.658 | 0.521  | 5.392  |          |       |      |
|          | 10-30  | c   | 0.765 | 0.708  | 4.091  | 3.400    | 0.747 | ln   |
|          |        | v   | 0.702 | 0.602  | 5.207  |          |       |      |
|          | 30-50  | c   | 2.176 | 1.200  | 6.289  | 3.800    | 0.123 | ln   |
|          |        | v   | 2.017 | 0.579  | 4.866  |          |       |      |
|          | 50-100 | c   | 2.701 | 1.641  | 6.064  | 1.500    | 0.998 | ln   |
|          |        | v   | 2.386 | 0.643  | 5.455  |          |       |      |
| pH       | 0-10   | c   | 0.094 | 0.134  | -0.855 | 1.700    | 0.734 |      |
|          |        | v   | 0.118 | 0.198  | -0.146 |          |       |      |
|          | 10-30  | c   | 0.095 | 0.138  | -0.813 | 2.200    | 0.692 |      |
|          |        | v   | 0.117 | 0.198  | -0.157 |          |       |      |
|          | 30-50  | c   | 0.108 | 0.173  | -0.505 | 2.400    | 0.540 |      |
|          |        | v   | 0.112 | 0.158  | -0.492 |          |       |      |
|          | 50-100 | c   | 0.106 | 0.158  | -0.536 | 2.200    | 0.542 |      |
|          |        | v   | 0.111 | 0.153  | -0.490 |          |       |      |
| SD       | -      | c   | 0.347 | 0.569  | 0.896  | 3.300    | 0.267 |      |
|          |        | v   | 0.324 | 0.481  | 0.824  |          |       |      |

**Table S7:** Descriptive statistics of soil properties of **ZH forest** by soil depth [cm] (N: number of samples, Ns: number of sampling sites, set: calibration dataset (c), independent validation dataset (v), Min: observed minimum, Max: observed maximum,  $\mu$ : mean,  $\sigma$ : standard deviation, CV: coefficient of variation  $\sigma/\mu$ ,  $CV_r$ : robust coefficient of variation [ratio of inter quantile range to median], Skew: coefficient of skewness,  $\alpha$ : effective range of experimental sample variogram [km], SSVR: spatially structured variance ratio  $1 - nugget/sill_{tot}$  [Vaysse and Lagacherie, 2015], Tr: transformation of response, ln: transformed by natural logarithm, ECEC: effective cation exchange capacity, BD: bulk density of fine soil fraction  $\leq 2$  mm), units see Table S1).

| response | depth | set | N    | Ns   | Min    | Max     | Median  | $\mu$   | $\sigma$ | CV    | $CV_r$ | Skew  | $\alpha$ | SSVR  | Tr |
|----------|-------|-----|------|------|--------|---------|---------|---------|----------|-------|--------|-------|----------|-------|----|
| ECEC     | 0-20  | c   | 1316 | 1055 | 17.364 | 780.000 | 149.333 | 170.157 | 100.202  | 0.589 | 0.952  | 1.169 | 1.100    | 1.000 | ln |
|          |       | v   | 528  | 293  | 17.760 | 492.385 | 121.382 | 150.404 | 94.018   | 0.625 | 1.002  | 1.077 |          |       |    |
|          | 40-60 | c   | 545  | 379  | 22.673 | 361.191 | 124.671 | 129.479 | 67.608   | 0.522 | 0.896  | 0.491 | 0.500    | 0.923 | ln |
|          |       | v   | 269  | 119  | 27.318 | 326.885 | 113.804 | 120.929 | 64.282   | 0.532 | 0.831  | 0.790 |          |       |    |
| pH       | 0-20  | c   | 1804 | 1475 | 2.585  | 7.650   | 4.842   | 5.137   | 1.352    | 0.263 | 0.539  | 0.262 | 3.200    | 0.890 |    |
|          |       | v   | 561  | 293  | 2.786  | 7.400   | 4.374   | 4.781   | 1.131    | 0.237 | 0.395  | 0.757 |          |       |    |
|          | 40-60 | c   | 953  | 693  | 3.050  | 7.810   | 5.165   | 5.269   | 1.282    | 0.243 | 0.480  | 0.198 | 5.700    | 0.491 |    |
|          |       | v   | 329  | 119  | 3.240  | 7.740   | 5.221   | 5.350   | 1.313    | 0.245 | 0.495  | 0.202 |          |       |    |
| BD       | 0-20  | c   | 780  | 551  | 0.411  | 1.510   | 0.870   | 0.870   | 0.066    | 0.076 | 0.079  | 0.788 | 62.700   | 0.631 |    |
|          |       | v   | 294  | 119  | 0.659  | 1.129   | 0.855   | 0.855   | 0.059    | 0.069 | 0.070  | 0.203 |          |       |    |
|          | 40-60 | c   | 469  | 368  | 0.908  | 1.550   | 1.133   | 1.140   | 0.060    | 0.053 | 0.046  | 1.885 | 0.400    | 0.887 |    |
|          |       | v   | 201  | 119  | 1.028  | 1.537   | 1.133   | 1.138   | 0.055    | 0.049 | 0.035  | 3.113 |          |       |    |

**Table S8:** Cross-validation (CV) statistics for models by study region and soil depth computed on the same CV subsets for all methods, except for RF where out-of-bag predictions were used. (RMSE: root mean squared error [units see Table S1],  $SS_{mse}$ : mean squared error skill score, lasso: grouped least absolute shrinkage and selection operator, georob: robust external-drift kriging, geoGAM: geoadditive model, BRT: boosted regression trees, RF: random forest, MA: model averaging, NA: no convergence of georob algorithm).

| depth             |        | lasso  |            | georob |            | geoGAM |            | BRT    |            | RF     |            | MA     |            |
|-------------------|--------|--------|------------|--------|------------|--------|------------|--------|------------|--------|------------|--------|------------|
| [cm]              |        | RMSE   | $SS_{mse}$ | RMSE   | $SS_{mse}$ | RMSE   | $SS_{mse}$ | RMSE   | $SS_{mse}$ | RMSE   | $SS_{mse}$ | RMSE   | $SS_{mse}$ |
| <b>Berne</b>      |        |        |            |        |            |        |            |        |            |        |            |        |            |
| clay              | 0-10   | 6.418  | 0.230      | 5.592  | 0.415      | 5.623  | 0.408      | 5.814  | 0.368      | 4.569  | 0.609      | 5.264  | 0.482      |
|                   | 10-30  | 7.855  | 0.121      | 6.762  | 0.348      | 7.124  | 0.277      | 6.952  | 0.311      | 5.333  | 0.595      | 6.394  | 0.417      |
|                   | 30-50  | 8.735  | 0.087      | 7.615  | 0.306      | 7.530  | 0.321      | 7.938  | 0.246      | 6.125  | 0.551      | 7.189  | 0.381      |
|                   | 50-100 | 9.848  | 0.002      | 8.669  | 0.227      | 9.002  | 0.166      | 9.085  | 0.150      | 6.960  | 0.501      | 8.259  | 0.298      |
| silt              | 0-10   | 10.518 | 0.001      | 9.286  | 0.221      | 9.379  | 0.206      | 9.351  | 0.210      | 7.444  | 0.500      | 8.732  | 0.311      |
|                   | 10-30  | 11.157 | 0.064      | 9.955  | 0.255      | 9.996  | 0.249      | 10.216 | 0.215      | 7.884  | 0.533      | 9.342  | 0.344      |
|                   | 30-50  | 11.387 | 0.184      | 10.094 | 0.359      | 10.333 | 0.328      | 10.546 | 0.301      | 8.101  | 0.587      | 9.538  | 0.428      |
|                   | 50-100 | 14.032 | 0.153      | 12.826 | 0.293      | 13.095 | 0.263      | 13.769 | 0.185      | 10.165 | 0.556      | 12.132 | 0.367      |
| gravel            | 0-10   | 2.997  | 0.110      | 2.425  | 0.417      | 2.714  | 0.270      | 2.848  | 0.196      | 2.138  | 0.547      | 2.474  | 0.393      |
|                   | 10-30  | 3.284  | 0.170      | 2.703  | 0.438      | 2.807  | 0.393      | 3.079  | 0.270      | 2.322  | 0.585      | 2.663  | 0.454      |
|                   | 30-50  | 4.990  | 0.132      | 4.336  | 0.345      | 4.613  | 0.258      | 4.616  | 0.257      | 3.641  | 0.538      | 4.246  | 0.371      |
|                   | 50-100 | 7.220  | 0.059      | 6.310  | 0.281      | 6.367  | 0.268      | 6.785  | 0.169      | 5.195  | 0.513      | 6.071  | 0.335      |
| SOM               | 0-10   | 6.712  | 0.571      | 5.025  | 0.759      | 5.472  | 0.715      | 5.059  | 0.756      | 3.969  | 0.850      | 4.662  | 0.793      |
|                   | 10-30  | 8.507  | 0.557      | 6.318  | 0.755      | 6.579  | 0.735      | 6.669  | 0.728      | 5.082  | 0.842      | 5.866  | 0.789      |
|                   | 30-50  | 19.559 | -0.099     | 12.337 | 0.563      | 14.695 | 0.380      | 9.781  | 0.725      | 7.863  | 0.822      | 9.229  | 0.755      |
|                   | 50-100 | 27.293 | -0.156     | 43.426 | -1.926     | 23.872 | 0.116      | 14.125 | 0.690      | 10.760 | 0.820      | 13.879 | 0.701      |
| pH                | 0-10   | 0.533  | 0.509      | 0.458  | 0.637      | 0.483  | 0.597      | 0.500  | 0.567      | 0.391  | 0.736      | 0.447  | 0.655      |
|                   | 10-30  | 0.541  | 0.486      | 0.467  | 0.617      | 0.495  | 0.570      | 0.495  | 0.570      | 0.389  | 0.735      | 0.447  | 0.649      |
|                   | 30-50  | 0.610  | 0.423      | 0.524  | 0.574      | 0.535  | 0.556      | 0.550  | 0.531      | 0.423  | 0.722      | 0.488  | 0.630      |
|                   | 50-100 | 0.681  | 0.393      | 0.582  | 0.557      | 0.606  | 0.519      | 0.613  | 0.508      | 0.471  | 0.710      | 0.541  | 0.617      |
| SD                | –      | 28.790 | 0.161      | 26.782 | 0.274      | 27.097 | 0.257      | 27.992 | 0.207      | 21.012 | 0.553      | 25.148 | 0.360      |
| <b>Greifensee</b> |        |        |            |        |            |        |            |        |            |        |            |        |            |
| clay              | 0-10   | 6.423  | 0.246      | 5.986  | 0.345      | 5.985  | 0.345      | 6.055  | 0.330      | 4.735  | 0.590      | 5.564  | 0.434      |
|                   | 10-30  | 6.438  | 0.239      | 5.999  | 0.340      | 6.000  | 0.339      | 6.258  | 0.281      | 4.832  | 0.571      | 5.631  | 0.418      |
|                   | 30-50  | 7.738  | 0.103      | 7.047  | 0.256      | 6.992  | 0.267      | 7.409  | 0.178      | 5.555  | 0.538      | 6.603  | 0.347      |
|                   | 50-100 | 8.602  | 0.079      | 7.899  | 0.224      | 7.976  | 0.208      | 8.259  | 0.151      | 6.229  | 0.517      | 7.376  | 0.323      |
| silt              | 0-10   | 6.001  | 0.059      | 5.384  | 0.242      | 5.436  | 0.228      | 5.663  | 0.162      | 4.327  | 0.511      | 5.088  | 0.323      |
|                   | 10-30  | 6.109  | 0.051      | 5.590  | 0.205      | 5.570  | 0.211      | 5.779  | 0.151      | 4.429  | 0.501      | 5.241  | 0.301      |
|                   | 30-50  | 7.144  | 0.058      | 6.603  | 0.195      | 6.725  | 0.165      | 6.944  | 0.110      | 5.205  | 0.500      | 6.210  | 0.288      |
|                   | 50-100 | 8.877  | 0.039      | 8.092  | 0.202      | 8.471  | 0.125      | 8.714  | 0.074      | 6.588  | 0.471      | 7.791  | 0.260      |
| gravel            | 0-10   | 5.985  | 0.115      | 5.552  | 0.238      | 5.575  | 0.232      | 5.797  | 0.169      | 4.471  | 0.506      | 5.182  | 0.336      |
|                   | 10-30  | 6.229  | 0.132      | 5.646  | 0.287      | 5.725  | 0.267      | 6.145  | 0.155      | 4.651  | 0.516      | 5.386  | 0.351      |
|                   | 30-50  | 8.144  | 0.142      | 8.045  | 0.162      | 7.606  | 0.251      | 7.900  | 0.192      | 6.112  | 0.516      | 7.161  | 0.336      |
|                   | 50-100 | 10.481 | 0.074      | 9.326  | 0.267      | 9.708  | 0.206      | 9.964  | 0.163      | 7.640  | 0.508      | 8.944  | 0.326      |
| SOM               | 0-10   | 3.046  | 0.128      | 2.630  | 0.350      | 3.921  | -0.444     | 2.915  | 0.202      | 2.210  | 0.541      | 2.588  | 0.371      |
|                   | 10-30  | 3.468  | 0.107      | 3.068  | 0.302      | 4.249  | -0.339     | 3.314  | 0.185      | 2.396  | 0.574      | 2.934  | 0.361      |
|                   | 30-50  | 4.932  | 0.009      | 4.631  | 0.126      | 4.915  | 0.016      | 4.666  | 0.113      | 3.329  | 0.548      | 4.290  | 0.250      |
|                   | 50-100 | 6.206  | -0.096     | NA     | NA         | 12.140 | -3.193     | 5.152  | 0.245      | 3.966  | 0.553      | 5.023  | 0.282      |
| pH                | 0-10   | 0.549  | 0.204      | 0.461  | 0.438      | 0.518  | 0.291      | 0.500  | 0.338      | 0.379  | 0.620      | 0.447  | 0.472      |
|                   | 10-30  | 0.546  | 0.225      | 0.462  | 0.445      | 0.519  | 0.302      | 0.513  | 0.316      | 0.386  | 0.614      | 0.450  | 0.475      |
|                   | 30-50  | 0.632  | 0.228      | 0.546  | 0.423      | 0.581  | 0.347      | 0.640  | 0.208      | 0.470  | 0.573      | 0.533  | 0.451      |
|                   | 50-100 | 0.623  | 0.234      | 0.520  | 0.468      | 0.634  | 0.207      | 0.604  | 0.282      | 0.461  | 0.580      | 0.522  | 0.463      |
| SD                | –      | 20.759 | 0.203      | 19.560 | 0.292      | 18.526 | 0.365      | 20.105 | 0.253      | 15.433 | 0.560      | 17.715 | 0.420      |
| <b>ZH forest</b>  |        |        |            |        |            |        |            |        |            |        |            |        |            |
| ECEC              | 0-20   | 83.288 | 0.309      | 68.589 | 0.524      | 73.800 | 0.431      | 73.661 | 0.451      | 53.449 | 0.711      | 66.399 | 0.554      |
|                   | 40-60  | 50.873 | 0.433      | 37.079 | 0.699      | 46.296 | 0.530      | 40.890 | 0.634      | 31.315 | 0.785      | 38.965 | 0.667      |
| pH                | 0-20   | 0.939  | 0.517      | 0.785  | 0.663      | 0.874  | 0.582      | 0.841  | 0.613      | 0.619  | 0.790      | 0.748  | 0.694      |
|                   | 20-60  | 0.943  | 0.458      | 0.719  | 0.685      | 0.786  | 0.624      | 0.775  | 0.635      | 0.581  | 0.795      | 0.680  | 0.719      |
| BD                | 0-20   | 0.059  | 0.205      | 0.049  | 0.449      | 0.053  | 0.352      | 0.051  | 0.415      | 0.038  | 0.670      | 0.046  | 0.515      |
|                   | 20-60  | 0.051  | 0.282      | 0.044  | 0.462      | 0.045  | 0.430      | 0.053  | 0.218      | 0.039  | 0.575      | 0.043  | 0.489      |

**Table S9:** Ratio [%] of squared bias to mean squared error (MSE) calculated for independent validation data (leg. map: legacy soil map 1:5 000, lasso: grouped least absolute shrinkage and selection operator, georob: robust external-drift kriging, geoGAM: geoadditive model, BRT: boosted regression trees, RF: random forest, MA: model averaging, NA: no convergence of georob algorithm).

| area        | response | depth [cm] | leg. map | lasso  | georob | geoGAM | BRT   | RF     | MA    |
|-------------|----------|------------|----------|--------|--------|--------|-------|--------|-------|
| Berne       | clay     | 0-10       |          | 0.497  | 2.795  | 2.396  | 1.272 | 0.924  | 1.695 |
|             |          | 10-30      |          | 0.570  | 1.556  | 1.206  | 0.025 | 0.280  | 0.764 |
|             |          | 30-50      |          | 0.045  | 0.077  | 0.190  | 0.022 | 0.057  | 0.026 |
|             |          | 50-100     |          | 0.377  | 0.753  | 1.198  | 1.551 | 1.897  | 1.305 |
|             | silt     | 0-10       |          | 1.035  | 3.832  | 0.036  | 0.129 | 0.184  | 0.540 |
|             |          | 10-30      |          | 0.736  | 1.064  | 0.055  | 0.090 | 0.041  | 0.202 |
|             |          | 30-50      |          | 0.281  | 0.751  | 0.000  | 0.024 | 0.000  | 0.017 |
|             |          | 50-100     |          | 0.058  | 0.444  | 0.376  | 0.747 | 0.938  | 0.504 |
|             | gravel   | 0-10       |          | 3.690  | 0.390  | 0.233  | 1.455 | 2.247  | 0.053 |
|             |          | 10-30      |          | 3.643  | 0.573  | 0.470  | 0.248 | 1.145  | 0.052 |
|             |          | 30-50      |          | 5.153  | 1.241  | 0.051  | 1.053 | 1.003  | 0.028 |
|             |          | 50-100     |          | 8.369  | 1.106  | 0.103  | 0.760 | 1.133  | 0.057 |
|             | SOM      | 0-10       |          | 2.042  | 0.353  | 0.362  | 0.704 | 1.061  | 0.068 |
|             |          | 10-30      |          | 0.105  | 1.180  | 0.032  | 2.794 | 5.486  | 1.609 |
|             |          | 30-50      |          | 8.433  | 0.934  | 0.103  | 8.350 | 14.196 | 4.245 |
|             |          | 50-100     |          | 12.137 | 1.425  | 2.393  | 7.269 | 10.268 | 1.388 |
| pH          | 0-10     |            | 0.883    | 0.242  | 0.562  | 0.126  | 0.313 | 0.402  |       |
|             | 10-30    |            | 0.778    | 0.194  | 0.227  | 0.222  | 0.379 | 0.353  |       |
|             | 30-50    |            | 1.515    | 0.039  | 0.731  | 0.019  | 0.352 | 0.272  |       |
|             | 50-100   |            | 3.605    | 0.308  | 1.155  | 0.447  | 3.288 | 1.667  |       |
| SD          | –        |            | 2.059    | 4.671  | 2.808  | 3.002  | 3.003 | 2.841  |       |
| Greifen-see | clay     | 0-10       | 10.500   | 0.897  | 1.341  | 1.120  | 0.497 | 1.063  | 1.038 |
|             |          | 10-30      | 12.700   | 0.198  | 0.177  | 0.299  | 0.065 | 0.234  | 0.200 |
|             |          | 30-50      | 11.500   | 1.080  | 0.000  | 0.020  | 0.018 | 0.122  | 0.117 |
|             |          | 50-100     | 14.300   | 0.495  | 0.056  | 0.027  | 0.001 | 0.007  | 0.007 |
|             | silt     | 0-10       |          | 0.071  | 0.002  | 0.036  | 0.000 | 0.014  | 0.001 |
|             |          | 10-30      |          | 0.029  | 0.042  | 0.000  | 0.370 | 0.007  | 0.042 |
|             |          | 30-50      |          | 0.300  | 0.104  | 0.213  | 0.488 | 0.459  | 0.312 |
|             |          | 50-100     |          | 2.079  | 0.981  | 1.265  | 1.545 | 1.924  | 1.594 |
|             | gravel   | 0-10       | 26.900   | 13.198 | 5.548  | 0.200  | 0.004 | 0.570  | 2.240 |
|             |          | 10-30      | 19.800   | 14.220 | 0.067  | 0.264  | 0.687 | 1.141  | 1.842 |
|             |          | 30-50      | 9.600    | 14.539 | 6.562  | 1.379  | 1.477 | 1.519  | 4.158 |
|             |          | 50-100     | 0.400    | 16.701 | 7.589  | 1.385  | 2.463 | 2.081  | 5.164 |
|             | SOM      | 0-10       |          | 5.954  | 0.002  | 3.532  | 0.766 | 0.759  | 1.388 |
|             |          | 10-30      |          | 8.024  | 0.217  | 2.789  | 0.981 | 0.432  | 1.181 |
|             |          | 30-50      |          | 6.717  | 3.632  | 5.074  | 0.470 | 0.719  | 2.684 |
|             |          | 50-100     |          | 5.775  | NA     | 0.028  | 1.402 | 1.291  | 1.739 |
| pH          | 0-10     |            | 6.285    | 4.702  | 4.252  | 4.931  | 6.038 | 5.532  |       |
|             | 10-30    |            | 4.715    | 4.694  | 4.600  | 4.023  | 5.564 | 5.084  |       |
|             | 30-50    |            | 6.604    | 4.615  | 5.982  | 5.020  | 7.798 | 6.450  |       |
|             | 50-100   |            | 5.570    | 2.378  | 2.897  | 5.097  | 5.551 | 4.438  |       |
| SD          | –        |            | 4.400    | 0.064  | 1.064  | 0.003  | 0.007 | 0.798  | 0.261 |
| ZH forest   | ECEC     | 0-20       |          | 2.839  | 1.540  | 0.707  | 0.692 | 0.754  | 0.243 |
|             |          | 40-60      |          | 0.244  | 10.645 | 1.484  | 4.575 | 3.755  | 5.355 |
|             | pH       | 0-20       |          | 1.116  | 1.348  | 0.314  | 0.460 | 2.414  | 1.202 |
|             |          | 40-60      |          | 0.687  | 3.136  | 1.623  | 0.143 | 0.000  | 0.094 |
|             | BD       | 0-20       |          | 4.475  | 0.043  | 0.033  | 0.040 | 0.407  | 0.189 |
|             |          | 40-60      |          | 0.181  | 0.672  | 0.154  | 0.198 | 1.352  | 0.000 |

**Table S10:** Optimal model parameters selected by minimizing RMSE in 10-fold cross-validation or out-of-bag for RF for **Berne** study region by soil depth [cm] ( $\lambda$ ): lasso shrinkage parameter,  $p_l$ : number of covariates with non-zero coefficients,  $p_g$ : number of covariates in final georob model,  $\sigma_n^2$ : nugget effect,  $\sigma_p^2$ : partial sill,  $\alpha$ : effective range [m],  $\psi$ : robustness tuning parameter,  $p_{tot}$ : total number of covariates in final geoGAM,  $p_s$ : number of smooth effects in final geoGAM,  $n_t$ : number of boosting iterations in BRT,  $i$ : interaction depth,  $pp$ : percentage of covariates with non-zero importance,  $m_{try}$ : number of covariates randomly sampled as candidates at each split in RF).

| response | depth  | lasso     |       | georob |              |                    | geoGAM             |          | BRT       |       | RF    |     |      | model averaging weights |       |        |        |       |       |
|----------|--------|-----------|-------|--------|--------------|--------------------|--------------------|----------|-----------|-------|-------|-----|------|-------------------------|-------|--------|--------|-------|-------|
|          |        | $\lambda$ | $p_l$ | $p_g$  | $\sigma_n^2$ | $\sigma_p^2$       | $\psi$             | $\alpha$ | $p_{tot}$ | $p_s$ | $n_t$ | $i$ | $pp$ | $m_{try}$               | lasso | georob | geoGAM | BRT   | RF    |
| clay     | 0-10   | 0.617     | 16    | 14     | 19.26        | 21.46              | 26870.2            | 1.75     | 17        | 15    | 98    | 5   | 44.9 | 273                     | 0.172 | 0.198  | 0.197  | 0.190 | 0.242 |
|          | 10-30  | 0.869     | 12    | 39     | 22.55        | $1.34 \times 10^4$ | $1.71 \times 10^7$ | 1.75     | 5         | 3     | 40    | 6   | 26.3 | 325                     | 0.170 | 0.198  | 0.188  | 0.193 | 0.251 |
|          | 30-50  | 1.204     | 7     | 9      | 33.84        | 22.90              | 6998.3             | 1.75     | 12        | 10    | 48    | 3   | 17.7 | 191                     | 0.171 | 0.197  | 0.199  | 0.189 | 0.244 |
|          | 50-100 | 1.969     | 1     | 28     | 37.41        | 34.66              | 1073.0             | 1.75     | 7         | 7     | 14    | 20  | 33.4 | 304                     | 0.175 | 0.198  | 0.191  | 0.189 | 0.247 |
| silt     | 0-10   | 1.303     | 5     | 6      | 28.71        | 39.30              | $1.44 \times 10^4$ | 1.75     | 5         | 3     | 28    | 8   | 27.0 | 75                      | 0.173 | 0.196  | 0.194  | 0.194 | 0.244 |
|          | 10-30  | 1.021     | 13    | 7      | 39.16        | 47.43              | $1.25 \times 10^4$ | 1.75     | 7         | 2     | 30    | 11  | 34.8 | 181                     | 0.174 | 0.195  | 0.194  | 0.190 | 0.246 |
|          | 30-50  | 0.784     | 16    | 22     | 59.69        | 48.07              | 7072.1             | 1.75     | 7         | 3     | 32    | 11  | 36.7 | 113                     | 0.175 | 0.197  | 0.193  | 0.189 | 0.246 |
|          | 50-100 | 1.226     | 15    | 16     | 94.59        | 65.43              | 1290.7             | 1.75     | 8         | 3     | 24    | 20  | 44.9 | 274                     | 0.180 | 0.197  | 0.193  | 0.183 | 0.248 |
| gravel   | 0-10   | 0.052     | 26    | 28     | 0.33         | 0.20               | 2897.5             | 1.75     | 10        | 2     | 84    | 7   | 47.6 | 119                     | 0.174 | 0.212  | 0.186  | 0.183 | 0.244 |
|          | 10-30  | 0.058     | 28    | 22     | 0.35         | 0.23               | 2928.3             | 1.75     | 15        | 9     | 152   | 3   | 44.1 | 92                      | 0.172 | 0.206  | 0.195  | 0.184 | 0.243 |
|          | 30-50  | 0.106     | 15    | 21     | 0.62         | 0.25               | 3759.9             | 1.75     | 10        | 4     | 22    | 18  | 39.9 | 109                     | 0.177 | 0.200  | 0.187  | 0.192 | 0.243 |
|          | 50-100 | 0.138     | 20    | 26     | 0.89         | 0.51               | 3644.3             | 1.75     | 13        | 6     | 38    | 7   | 30.1 | 131                     | 0.176 | 0.197  | 0.193  | 0.188 | 0.245 |
| SOM      | 0-10   | 0.033     | 24    | 29     | 0.09         | 0.10               | 2385.7             | 1.75     | 11        | 5     | 184   | 5   | 56.5 | 141                     | 0.153 | 0.204  | 0.182  | 0.203 | 0.258 |
|          | 10-30  | 0.039     | 29    | 34     | 0.14         | 0.09               | 1857.4             | 1.75     | 13        | 8     | 106   | 6   | 49.5 | 337                     | 0.153 | 0.206  | 0.191  | 0.195 | 0.256 |
|          | 30-50  | 0.537     | 5     | 16     | 0.60         | $1.78 \times 10^4$ | $3.98 \times 10^9$ | 1.75     | 14        | 10    | 150   | 5   | 53.0 | 384                     | 0.119 | 0.189  | 0.157  | 0.238 | 0.296 |
|          | 50-100 | 0.566     | 11    | 11     | 6.32         | $2.42 \times 10^5$ | $1.52 \times 10^9$ | 1.75     | 11        | 6     | 118   | 5   | 45.6 | 116                     | 0.161 | 0.002  | 0.118  | 0.311 | 0.408 |
| pH       | 0-10   | 0.045     | 20    | 22     | 0.12         | 0.13               | 1114.7             | 1.75     | 13        | 5     | 250   | 1   | 27.7 | 232                     | 0.176 | 0.204  | 0.194  | 0.187 | 0.240 |
|          | 10-30  | 0.040     | 30    | 20     | 0.13         | 0.13               | 1176.6             | 1.75     | 7         | 1     | 100   | 6   | 48.6 | 121                     | 0.174 | 0.202  | 0.191  | 0.191 | 0.243 |
|          | 30-50  | 0.045     | 30    | 19     | 0.20         | 0.14               | 3541.3             | 1.75     | 10        | 6     | 144   | 9   | 64.0 | 391                     | 0.171 | 0.199  | 0.195  | 0.189 | 0.246 |
|          | 50-100 | 0.041     | 26    | 34     | 0.12         | 0.24               | 416.9              | 1.75     | 19        | 12    | 190   | 14  | 74.8 | 288                     | 0.171 | 0.200  | 0.192  | 0.190 | 0.247 |
| SD       | -      | 1.782     | 25    | 22     | 619.62       | 101.10             | 4634.1             | 1.75     | 10        | 4     | 28    | 16  | 42.3 | 183                     | 0.181 | 0.194  | 0.192  | 0.186 | 0.247 |

**Table S11:** Model parameters for **Greifensee** and **ZH forest** study regions (for description see Table S10, NA: no convergence of georob algorithm).

| response          | depth  | lasso     |       | $p_g$ | $\sigma_n^2$ | $\sigma_p^2$ | georob       |              | $\alpha$ | $\psi$ | geoGAM    |       | BRT   |     | RF    | model averaging weights |           |       |        |
|-------------------|--------|-----------|-------|-------|--------------|--------------|--------------|--------------|----------|--------|-----------|-------|-------|-----|-------|-------------------------|-----------|-------|--------|
|                   |        | $\lambda$ | $p_l$ |       |              |              | $\sigma_n^2$ | $\sigma_p^2$ |          |        | $p_{tot}$ | $p_s$ | $n_t$ | $i$ |       | $pp$                    | $m_{try}$ | lasso | georob |
| <b>Greifensee</b> |        |           |       |       |              |              |              |              |          |        |           |       |       |     |       |                         |           |       |        |
| clay              | 0-10   | 0.517     | 21    | 25    | 3.29         | 33.37        | 279.4        | 1.75         | 12       | 5      | 134       | 2     | 30.0  | 455 | 0.180 | 0.193                   | 0.191     | 0.244 |        |
|                   | 10-30  | 0.514     | 22    | 27    | 4.82         | 31.90        | 259.2        | 3.00         | 11       | 5      | 44        | 8     | 37.8  | 245 | 0.182 | 0.195                   | 0.187     | 0.242 |        |
|                   | 30-50  | 0.930     | 11    | 26    | 1.72         | 48.34        | 158.1        | 1.75         | 10       | 7      | 32        | 14    | 44.4  | 273 | 0.177 | 0.195                   | 0.185     | 0.247 |        |
|                   | 50-100 | 0.836     | 13    | 25    | 51.10        | 16.52        | 7074.3       | 1.75         | 17       | 15     | 164       | 1     | 21.6  | 225 | 0.179 | 0.195                   | 0.186     | 0.247 |        |
| silt              | 0-10   | 0.656     | 6     | 27    | 6.02         | 22.59        | 279.3        | 1.75         | 15       | 12     | 28        | 11    | 34.1  | 316 | 0.177 | 0.197                   | 0.187     | 0.245 |        |
|                   | 10-30  | 0.662     | 7     | 25    | 1.42         | 30.36        | 237.0        | 1.75         | 11       | 8      | 16        | 42    | 51.8  | 414 | 0.178 | 0.194                   | 0.188     | 0.245 |        |
|                   | 30-50  | 0.798     | 8     | 37    | 2.26         | 40.87        | 233.0        | 1.75         | 7        | 5      | 40        | 9     | 37.1  | 256 | 0.180 | 0.195                   | 0.186     | 0.248 |        |
|                   | 50-100 | 1.224     | 4     | 38    | 6.40         | 60.18        | 270.8        | 1.75         | 6        | 4      | 12        | 12    | 21.8  | 413 | 0.181 | 0.199                   | 0.185     | 0.244 |        |
| gravel            | 0-10   | 0.111     | 20    | 22    | 1.19         | 0.00         | 3.6          | 1000.00      | 10       | 4      | 36        | 10    | 41.0  | 212 | 0.183 | 0.193                   | 0.189     | 0.245 |        |
|                   | 10-30  | 0.100     | 22    | 24    | 0.11         | 1.05         | 191.7        | 1000.00      | 11       | 5      | 48        | 3     | 20.0  | 284 | 0.182 | 0.197                   | 0.184     | 0.244 |        |
|                   | 30-50  | 0.128     | 21    | 43    | 1.45         | 0.41         | 2244.8       | 1.75         | 10       | 6      | 40        | 2     | 12.0  | 410 | 0.185 | 0.184                   | 0.191     | 0.247 |        |
|                   | 50-100 | 0.163     | 19    | 20    | 1.56         | 0.72         | 1339.3       | 1.75         | 11       | 6      | 44        | 2     | 13.1  | 53  | 0.180 | 0.197                   | 0.188     | 0.246 |        |
| SOM               | 0-10   | 0.021     | 38    | 48    | 0.01         | 0.14         | 240.8        | 1.75         | 27       | 22     | 90        | 20    | 71.7  | 168 | 0.179 | 0.207                   | 0.180     | 0.247 |        |
|                   | 10-30  | 0.036     | 21    | 49    | 0.01         | 0.19         | 279.5        | 1.75         | 19       | 14     | 24        | 18    | 40.2  | 147 | 0.175 | 0.198                   | 0.191     | 0.253 |        |
|                   | 30-50  | 0.077     | 39    | 6     | 0.46         | 0.16         | 2739.5       | 1.75         | 14       | 12     | 12        | 11    | 15.7  | 78  | 0.178 | 0.190                   | 0.178     | 0.264 |        |
|                   | 50-100 | 0.596     | 11    | NA    | NA           | NA           | NA           | NA           | 11       | 8      | 36        | 16    | 44.8  | 382 | 0.250 | 0.000                   | 0.057     | 0.392 |        |
| pH                | 0-10   | 0.030     | 35    | 36    | 0.04         | 0.25         | 214.1        | 1.75         | 17       | 11     | 160       | 10    | 72.1  | 250 | 0.173 | 0.205                   | 0.183     | 0.250 |        |
|                   | 10-30  | 0.031     | 29    | 42    | 0.04         | 0.24         | 260.9        | 1.75         | 16       | 9      | 134       | 7     | 62.3  | 131 | 0.175 | 0.207                   | 0.184     | 0.248 |        |
|                   | 30-50  | 0.045     | 28    | 25    | 0.03         | 0.29         | 279.8        | 1.75         | 11       | 8      | 32        | 6     | 26.8  | 50  | 0.179 | 0.208                   | 0.195     | 0.241 |        |
|                   | 50-100 | 0.061     | 25    | 25    | 0.04         | 0.27         | 319.5        | 1.75         | 7        | 1      | 86        | 3     | 30.3  | 98  | 0.180 | 0.216                   | 0.177     | 0.243 |        |
| SD                | –      | 0.712     | 49    | 45    | 32.38        | 323.81       | 6.0          | 1000.00      | 14       | 11     | 44        | 5     | 27.9  | 384 | 0.180 | 0.191                   | 0.202     | 0.186 | 0.242  |
| <b>ZH forest</b>  |        |           |       |       |              |              |              |              |          |        |           |       |       |     |       |                         |           |       |        |
| ECEC              | 0-20   | 0.023     | 33    | 45    | 0.01         | 0.19         | 207.4        | 1.75         | 11       | 6      | 72        | 42    | 75.3  | 128 | 0.170 | 0.200                   | 0.185     | 0.187 | 0.257  |
|                   | 40-60  | 0.014     | 53    | 59    | 0.01         | 0.09         | 211.7        | 1.75         | 13       | 3      | 124       | 16    | 85.7  | 120 | 0.158 | 0.216                   | 0.173     | 0.196 | 0.256  |
| pH                | 0-20   | 0.029     | 46    | 38    | 0.05         | 0.79         | 89.0         | 1.75         | 20       | 16     | 96        | 18    | 81.2  | 127 | 0.169 | 0.203                   | 0.182     | 0.189 | 0.257  |
|                   | 40-60  | 0.029     | 44    | 41    | 0.07         | 0.77         | 188.8        | 1.75         | 30       | 24     | 780       | 2     | 77.3  | 138 | 0.157 | 0.206                   | 0.189     | 0.192 | 0.256  |
| BD                | 0-20   | 0.007     | 8     | 26    | 0.00         | 0.00         | 276.6        | 1.75         | 7        | 2      | 36        | 18    | 65.0  | 320 | 0.166 | 0.199                   | 0.184     | 0.193 | 0.258  |
|                   | 40-60  | 0.009     | 6     | 9     | 0.00         | 0.00         | 1048.4       | 1.75         | 4        | 3      | 24        | 7     | 32.1  | 290 | 0.181 | 0.209                   | 0.203     | 0.173 | 0.235  |

## References

- AGR: Geoprodukt Geologische Rohstoffkarte ADT, Metadaten komplett. Amt für Gemeinden und Raumordnung des Kantons Bern, [www.be.ch/geoportal](http://www.be.ch/geoportal), last access: 04.04.2017, 2015.
- ALN: Historische Feuchtgebiete der Wildkarte 1850. Amt für Landschaft und Natur des Kantons Zürich, <http://www.aln.zh.ch/internet/baudirektion/aln/de/naturschutz/naturschutzdaten/geodaten.html>, last access 29.03.2017, 2002.
- ALN: Geologische Karte des Kantons Zürich nach Hantke et. al 1967, GIS-ZH Nr. 41. Amt für Landschaft und Natur des Kantons Zürich, [http://www.gis.zh.ch/Dokus/Geolion/gds\\_41.pdf](http://www.gis.zh.ch/Dokus/Geolion/gds_41.pdf), last access: 15.02.2015, 2014a.
- ALN: Meliorationskataster des Kantons Zürich, GIS-ZH Nr. 148. Amt für Landschaft und Natur des Kantons Zürich., <http://www.geolion.zh.ch/geodatensatz/show?nbid=387>, last access 29.03.2017, 2014b.
- AWA: Geoprodukt Versickerungszonen VSZ, Metadaten komplett. Amt für Wasser und Abfall des Kantons Bern, [www.be.ch/geoportal](http://www.be.ch/geoportal), last access: 04.04.2017, 2014a.
- AWA: Geoprodukt Grundwasserkarte GW25, Metadaten komplett. Amt für Wasser und Abfall des Kantons Bern, [www.be.ch/geoportal](http://www.be.ch/geoportal), last access: 04.04.2017, 2014b.
- AWEL: Hinweisflächen für anthropogene Böden, GIS-ZH Nr. 260. Amt für Abfall, Wasser, Energie und Luft des Kanton Zürich, <http://www.geolion.zh.ch/geodatensatz/show?nbid=985>, last access 29.03.2017, 2012.
- AWEL: Grundwasservorkommen, GIS-ZH Nr. 327. Amt für Abfall, Wasser, Energie und Luft des Kanton Zürich, <http://www.geolion.zh.ch/geodatensatz/show?nbid=723>, last access 29.03.2017, 2014.
- AWEL: NO<sub>2</sub>-Immissionen, GIS-ZH Nr. 82, Amt für Abfall, Wasser, Energie und Luft des Kanton Zürich, <http://www.geolion.zh.ch/geodatensatz/show?nbid=783>, last access 29.03.2017, 2015.
- BAFU: Strukturierung und Adressierung des Gewässernetzes 1:25'000 nach Modell gwn25-07. Bundesamt für Umwelt, <http://www.bafu.admin.ch/wasser/13462/13496/15011>, last accessed 07.06.2016, 2009.
- BAFU: Luftbelastung: Karten Jahreswerte, Ammoniak und Stickstoffdeposition, Jahresmittel 2007 (modelliert durch METEOTEST), <http://www.bafu.admin.ch/luft/luftbelas-tung/schadstoffkarten>, last access 15.02.2015, 2011.
- BAFU and GRID-Europe: Swiss Environmental Domains. A new spatial framework for reporting on the environment, Environmental studies 1024, Federal Office for the Environment FOEN, Berne, URL <http://www.bafu.admin.ch/publikationen/publikation/01564/index.html?lang=en>, 2010.
- Berry, J.: Use surface area for realistic calculations?, *Geoworld*, 15, 2002.
- BFS: GEOSTAT Benutzerhandbuch, Bundesamt für Statistik, Bern, 2001.
- Brassel, P. and Lischke, H., eds.: Swiss National Forest Inventory: Methods and models of the second assessment, Swiss Federal Institute for Forest, Snow and Landscape Research WSL, Birmensdorf, 2001.
- Brunner, J., Jäggi, F., Nievergelt, J., and Peyer, K.: Kartieren und Beurteilen von Landwirtschaftsböden, FAL Schriftenreihe 24, Eidgenössische Forschungsanstalt für Agrarökologie und Landbau, Zürich-Reckenholz (FAL), 1997.
- DMC: Disaster Monitoring Constellation International Imaging, <http://www.dmcii.com>, last access: 03.02.2015, 2015.
- ELF: Schweizerische Referenzmethoden der Forschungsanstalten Agroscope – Boden- und Substratuntersuchungen zur Düngeberatung, Loseblattordner E1.011.d 1, Forschungsanstalten Agroscope ART und ACW, Zürich und Changins, Ausgabe 1996 mit Änderungen von 1997 bis 2009, Version 2015, Methode “AAE-10”, 1996.
- Evans, I. S.: General geomorphometry, derivatives of altitude, and descriptive statistics, in: *Spatial Analysis in Geomorphology*, edited by Chorley, R. J., pp. 17–90, Harper & Row, 1972.
- Evans, J. S., Oakleaf, J., and Cushman, S.: A Toolbox for Surface Gradient Modeling, <http://evansmurphy.wix.com/evansspatial>, last accessed 04.04.2017, 2014.



- FAC: Methoden für Bodenuntersuchungen, no. 5 in Schriftenreihe der FAC, Liebefeld, Eidgenössische Forschungsanstalt für Agrikulturchemie und Umwelthygiene (FAC), 1989.
- FSO: Swiss soil suitability map. BFS GEOSTAT. Swiss Federal Statistical Office, [http://www.bfs.admin.ch/bfs/portal/de/index/dienstleistungen/geostat/datenbeschreibung/digitale\\_bodeneignungskarte.html](http://www.bfs.admin.ch/bfs/portal/de/index/dienstleistungen/geostat/datenbeschreibung/digitale_bodeneignungskarte.html), last access 15.02.2015, 2000a.
- FSO: Tree composition of Swiss forests. BFS GEOSTAT. Swiss Federal Statistical Office, <http://www.bfs.admin.ch/bfs/portal/de/index/dienstleistungen/geostat/datenbeschreibung/waldmischungsgrad.html>, last access 15.02.2015, 2000b.
- Gallant, J., Dowling, T., and Austin, J.: Multi-resolution Ridge Top Flatness (MrRTF, 3" resolution). v1, CSIRO. Data Collection, doi:10.4225/08/512EEA6332EEB, 2013.
- Gallant, J. C. and Dowling, T. I.: A multiresolution index of valley bottom flatness for mapping depositional areas, *Water Resour Res*, 39, doi:10.1029/2002WR001426, 2003.
- Gams, H.: Zur Geschichte, klimatischen Begrenzung und Gliederung der immergrünen Mittelmeerstufe, *Veröff. Geobot. Eidgenöss. Tech. Hochsch., Stift. Rübel Zürich*, 12, 163–204, 1935.
- Grier, C. G. and Running, S. W.: Leaf Area of Mature Northwestern Coniferous Forests: Relation to Site Water Balance, *Ecology*, 58, 893 – 899, doi:10.2307/1936225, 1977.
- Gurtz, J., Baltensweiler, A., and Lang, H.: Spatially distributed hydrotope based modelling of evapotranspiration and runoff in mountainous basins, *Hydrol Process*, 13, 2751–2768, 1999.
- Hobson, R. D.: Surface roughness in topography: a quantitative approach, in: *Spatial analysis in geomorphology*, edited by Chorley, R. J., pp. 221–245, Harper & Row, 1972.
- Hueni, A., Lenhard, K., Baumgartner, A., and Schaepman, M. E.: Airborne prism experiment calibration information system, *IEEE Trans Geosci Remote Sensing*, 51, 5169–5180, doi:10.1109/tgrs.2013.2246575, 2013.
- Iwahashi, J. and Pike, R. J.: Automated classifications of topography from DEMs by an unsupervised nested-means algorithm and a three-part geometric signature, *Geomorphology*, 86, 409–440, doi:10.1016/j.geomorph.2006.09.012, 2007.
- Jäggi, F., Peyer, K., Pazeller, A., and Schwab, P.: Grundlagenbericht zur Bodenkartierung des Kantons Zürich, *Tech. rep.*, Volkswirtschaftsdirektion des Kantons Zürich und Eidg. Forschungsanstalt für Agrarökologie und Landbau Zürich Reckenholz FAL, 1998.
- Jehle, M., Hueni, A., Damm, A., D'Odorico, P., Weyermann, J., Kneubühler, M., and Meuleman, K.: APEX – current status, performance and validation concept, in: *Sensors, 2010 IEEE*, pp. 533–537, doi:10.1109/ICSENS.2010.5690122, URL <http://ieeexplore.ieee.org/document/5690122/?reload=true>, 2010.
- Jenness, J.: Topographic Position Index (TPI) v. 1.2, <http://www.jennessent.com>, last access: 04.04.2017, 2006.
- Kiss, R.: Determination of drainage network in digital elevation models, utilities and limitations, *Journal of Hungarian Geomathematic*, 2, 2004.
- Kriegler, F. J., Malila, W. A., Nalepka, R. F., and Richardson, W.: Preprocessing Transformations and Their Effects on Multispectral Recognition, in: *Remote Sensing of Environment*, VI, p. 97, 1969.
- Lakanen, E. and Erviö, R.: A comparison of eight extractants for the determination of plant available micronutrients in soils, *Acta Agralia Fennica*, 123, 223–232, 1971.
- LANAT: Geoprodukt Landwirtschaftliche Eignungskarte LWEK74, Metadaten komplett. Amt für Landwirtschaft und Natur, Kanton Bern, URL [http://files.be.ch/bve/agi/geoportal/geo/lpi/LWEK74\\_1974\\_01\\_LANG\\_DE.PDF](http://files.be.ch/bve/agi/geoportal/geo/lpi/LWEK74_1974_01_LANG_DE.PDF), last access: 04.04.2017, 2015.
- Mathys, L. and Kellenberger, T.: Spot5 RadcorMosaic of Switzerland, *Tech. rep.*, National Point of Contact for Satellite Images NPOC: Swisstopo; Remote Sensing Laboratories, University of Zurich, Zurich, 2009.
- Nussbaum, M. and Papritz, A.: Transferfunktionen Nährstoffmesswerte, Bericht, ETH Zürich, Soil and Terrestrial Environmental Physics, doi:http://dx.doi.org/10.3929/ethz-a-010810702, Version 2, mit kl. Änderung 27. Nov. 2016, 2015.
- Nussbaum, M., Papritz, A., Baltensweiler, A., and Walthert, L.: Estimating soil organic carbon stocks of Swiss forest soils by robust external-drift kriging, *Geosci Model Dev*, 7, 1197–1210, doi:10.5194/gmd-7-1197-2014, URL <http://www.geosci-model-dev.net/7/1197/2014/>, 2014.

- Nussbaum, M., Papritz, A., Zimmerman, S., and Walthert, L.: Pedotransfer function to predict density of forest soils in Switzerland, *J Plant Nutr Soil Sci*, 179, 321–326, doi:10.1002/jpln.201500546, 2016.
- Remund, J., Frehner, M., Walthert, L., Kägi, M., and Rihm, B.: Schätzung standortspezifischer Trockenstressrisiken in Schweizer Wäldern, 2011.
- Ribi, A.: Messung des pH-Wertes in einer Boden-CaCl<sub>2</sub>-Suspension, Standard-Arbeitsanweisung Labor AN 104 (Version 2), Gewässerschutzlabor Amt für Abfall, Wasser, Energie und Luft, Baudirektion Kanton Zürich (Prüfleiter: Christian Balsiger), Zürich, 2008.
- Ribi, A.: Körnung der Feinerde, Standard-Arbeitsanweisung Labor FB 122 (Version 1), Fachstelle Bodenschutz, Amt für Landschaft und Natur, Baudirektion Kanton Zürich (Prüfleiter: Ubaldo Gasser), Zürich, 2014.
- Riley, S., De Gloria, S., and Elliot, R.: A Terrain Ruggedness that Quantifies Topographic Heterogeneity, *Intermountain Journal of Science*, 5, 23–27, 1999.
- Schaepman, M., Jehle, M., Hueni, A., D’Odorico, P., Damm, A., Weyermann, J., Schneider, F., Laurent, V., Popp, C., Seidel, F., Lenhard, K., Gege, P., Küchler, C., Brazile, J., Kohler, P., Vos, L., Meuleman, K., Meynart, R., Schläpfer, D., and Itten, K.: Advanced radiometry measurements and Earth science applications with the Airborne Prism Experiment (APEX), *Remote Sens Environ*, 158, 207–219, doi:10.1016/j.rse.2014.11.014, 2015.
- Schmider, P., Küper, M., Tschander, B., and Käser, B.: Die Waldstandorte im Kanton Zürich Waldgesellschaften, Waldbau Naturkunde, vdf Verlag der Fachvereine an den schweizerischen Hochschulen und Techniken, Zürich, 1993.
- Swisstopo: Geologische Karte der Schweiz 1:500000, URL <http://www.swisstopo.admin.ch/internet/swisstopo/de/home/products/maps/geology/geomaps/gm500.html>, last access: 07.06.2016, 2005.
- Swisstopo: Switzerland during the Last Glacial Maximum 1:500000, URL <http://www.swisstopo.admin.ch/internet/swisstopo/en/home/products/maps/geology/geomaps/LGM-map500.html>, last access: 07.06.2016, 2009.
- Swisstopo: Höhenmodelle, URL <http://www.swisstopo.admin.ch/internet/swisstopo/de/home/products/height.html>, last access: 07.06.2016, 2011.
- Swisstopo: swissAlti3D. Das hoch aufgelöste Terrainmodell der Schweiz, <http://www.swisstopo.admin.ch/internet/swisstopo/de/home/products/height/swissALTI3D.html>, last access: 07.06.2016, 2013.
- Swisstopo: GeoCover, Zugang zu flächendeckende geologische Datensätze für alle, URL [https://shop.swisstopo.admin.ch/de/products/maps/geology/GC\\_VECTOR](https://shop.swisstopo.admin.ch/de/products/maps/geology/GC_VECTOR), last access: 14.11.2016, 2016.
- Tarboton, D. G.: A new Method for the Determination of Flow Directions and Upslope Areas in Grid Digital Elevation Models, *Water Resour Res*, 33, PP. 309–319, doi:199710.1029/96WR03137, 1997.
- USGS EROS: USGS Land Remote Sensing Program, Landsat 7 Scene 01.09.2013. U.S. Geological Survey’s Earth Resources Observation and Science Center, 2013.
- Van Remortel, R. D., Maichle, R. W., and Hickey, R. J.: Computing the LS factor for the Revised Universal Soil Loss Equation through array-based slope processing of digital elevation data using a C++ executable, *Comput Geosci*, 30, 1043–1053, doi:10.1016/j.cageo.2004.08.001, 2004.
- Vaysse, K. and Lagacherie, P.: Evaluating Digital Soil Mapping approaches for mapping Global-SoilMap soil properties from legacy data in Languedoc-Roussillon (France), *Geoderma Regional*, 4, 20–30, doi:10.1016/j.geodrs.2014.11.003, 2015.
- Walthert, L., Zimmermann, S., Blaser, P., Luster, J., and Lüscher, P.: Waldböden der Schweiz. Band 1. Grundlagen und Region Jura, Eidg. Forschungsanstalt WSL and Hep Verlag, Birmensdorf and Bern, 2004.
- Walthert, L., Pannatier, E. G., and Meier, E. S.: Shortage of nutrients and excess of toxic elements in soils limit the distribution of soil-sensitive tree species in temperate forests, *For Ecol Manage*, 297, 94–107, doi:10.1016/j.foreco.2013.02.008, 2013.
- Walthert, L., Bridler, L., Keller, A., Lussi, M., and Grob, U.: Harmonisierung von Bodendaten im Projekt “Predictive mapping of soil properties for the evaluation of soil functions at regional scale (PMSoil)” des Nationalen Forschungsprogramms Boden (NFP 68), Bericht, Eid-

- genössische Forschungsanstalt WSL und Agroscope Reckenholz, Birmensdorf und Zürich, doi: 10.3929/ethz-a-010801994, 2016.
- Wüst-Galley, C., Grünig, A., and Leifeld, J.: Locating organic soils for the Swiss greenhouse gas inventory, Agroscope Science 26, Agroscope, Zurich, URL [https://www.bafu.admin.ch/dam/bafu/en/dokumente/klima/klima-climatereporting-referenzen-cp2/wuest-galley\\_c\\_gruenigaleifeldj2015.pdf.download.pdf](https://www.bafu.admin.ch/dam/bafu/en/dokumente/klima/klima-climatereporting-referenzen-cp2/wuest-galley_c_gruenigaleifeldj2015.pdf.download.pdf), last access: 29.03.2017, 2015.
- Yokoyama, R., Shirasawa, M., and Pike, R. J.: Visualizing Topography by Openness: A New Application of Image Processing to Digital Elevation Models, Photogramm Eng Remote Sens, 68, 257–265, 2002.
- Zimmermann, N. E.: Calculation of Topographic Position, [http://www.wsl.ch/staff/niklaus.zimmermann/programs/am14\\_1.html](http://www.wsl.ch/staff/niklaus.zimmermann/programs/am14_1.html), last access: 15.02.2015, 2000.
- Zimmermann, N. E. and Kienast, F.: Predictive mapping of alpine grasslands in Switzerland: Species versus community approach, J Veg Sci, 10, 469–482, doi:10.2307/3237182, 1999.
